# Supplementary material for: High-Tg PLA copolymers via base-catalyzed transesterification of PLA with 2,5,7-trioxabicyclo[2.2.2]octan-6-one
Source: Royal Society of Chemistry journal article supplement (doi:10.1039/d3py01250f), 2023-11-30
Supplement: d3py01250f1.pdf [file d3py01250f1.pdf]

## Electronic Supplementary Information

High- $T_g$  PLA copolymers *via* base-catalyzed transesterification of PLA with 2,5,7-trioxabicyclo[2.2.2]octan-6-one

Tong Zhou, Yu-Ting Guo, Chun Yang, Xian-Bin Meng, Fu-Sheng Du\* and Zi-Chen Li\*

*Beijing National Laboratory for Molecular Sciences (BNLMS), Key Laboratory of Polym. Chem. & Physics of Ministry of Education, Department of Polymer Science & Engineering, College of Chemistry and Molecular Engineering, Center for Soft Matter Science and Engineering, Peking University, Beijing 100871, China*

## Contents

1. Characterization of monomers
2. Characterization of **PTOB**
3. Characterization of oligomers of **TOB**
4. Characterization of PLA-*co*-**PTOB**

# 1. Characterization of monomers

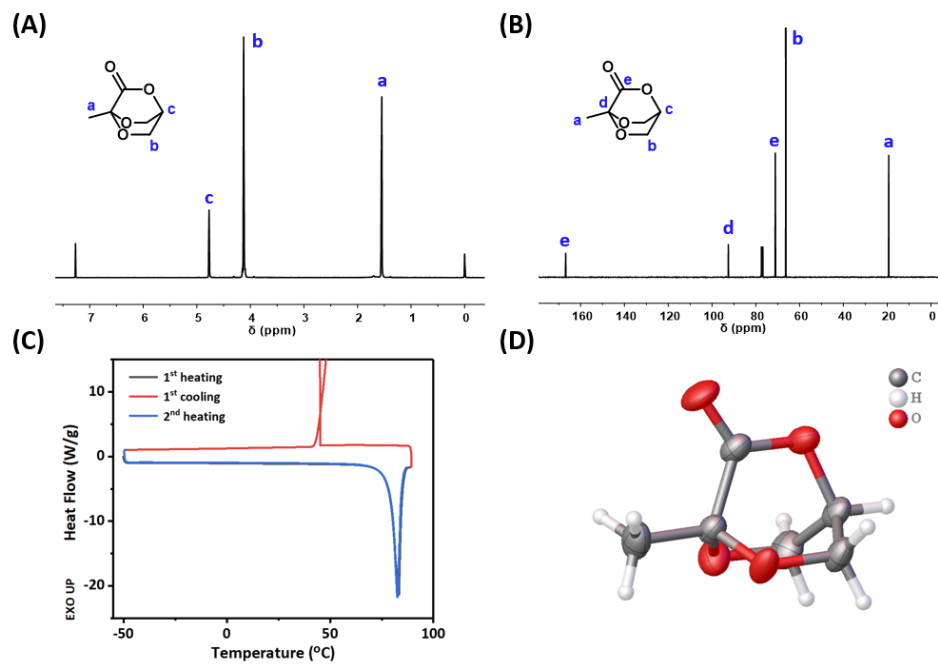

Fig. S1 Characterization of monomer 1Me-TOB

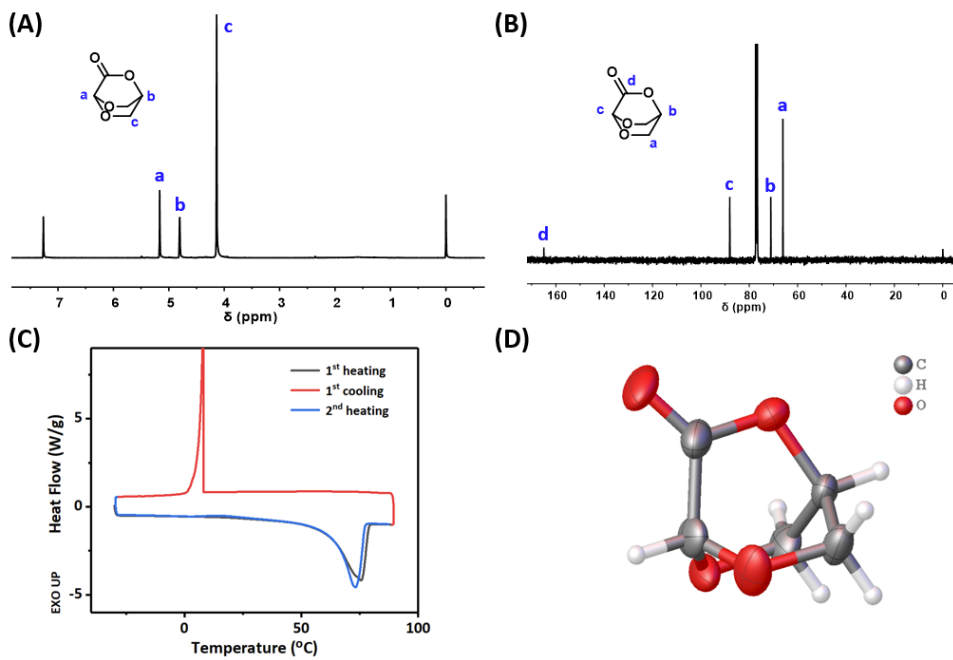

Fig. S2 Characterization of monomer TOB

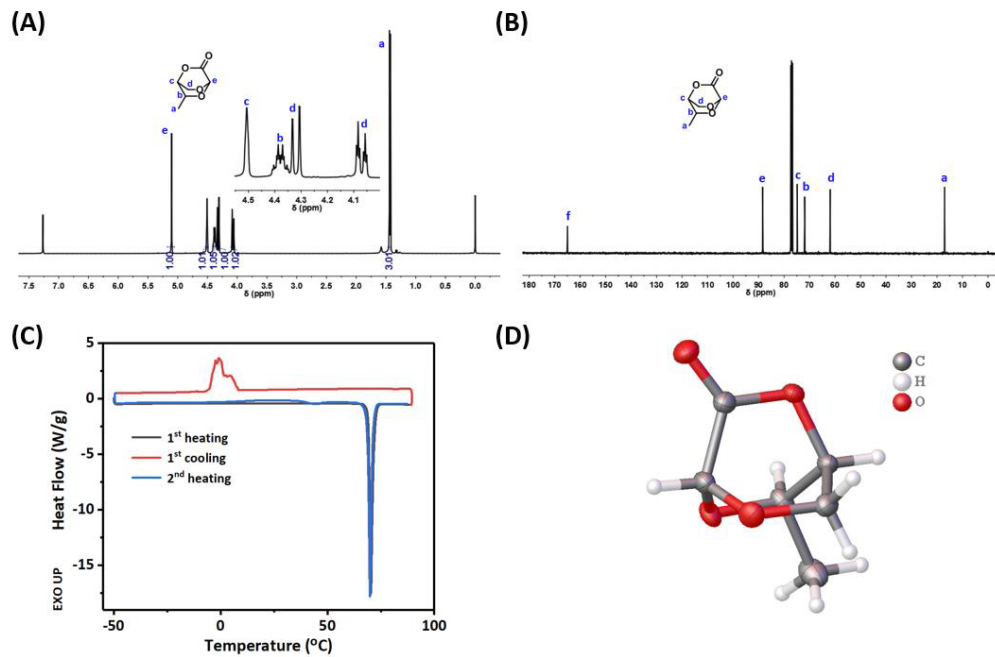

**Fig. S3** Characterization of monomer 3Me-TOB

**Table S1** Crystal data and structure refinement for **1Me-TOB**

|                                           |                                                                      |
|-------------------------------------------|----------------------------------------------------------------------|
| CCDC number                               | 2216470                                                              |
| Empirical formula                         | C <sub>6</sub> H <sub>8</sub> O <sub>4</sub>                         |
| Formula weight                            | 144.12                                                               |
| Temperature/K                             | 180.00                                                               |
| Crystal system                            | orthorhombic                                                         |
| Space group                               | Pbca                                                                 |
| a/Å                                       | 6.6336(3)                                                            |
| b/Å                                       | 10.5499(6)                                                           |
| c/Å                                       | 18.8351(15)                                                          |
| $\alpha$ /°                               | 90                                                                   |
| $\beta$ /°                                | 90                                                                   |
| $\gamma$ /°                               | 90                                                                   |
| Volume/Å <sup>3</sup>                     | 1318.15(14)                                                          |
| Z                                         | 8                                                                    |
| $\rho_{\text{calc}}/\text{cm}^3$          | 1.452                                                                |
| $\mu/\text{mm}^{-1}$                      | 0.124                                                                |
| F(000)                                    | 608                                                                  |
| Radiation                                 | Mo K $\alpha$                                                        |
| 2 $\Theta$ range for data collection/°    | 7.5040 to 56.7120                                                    |
| Index ranges                              | -8 $\leq$ h $\leq$ 8, -13 $\leq$ k $\leq$ 13, -14 $\leq$ l $\leq$ 24 |
| Reflections collected                     | 4711                                                                 |
| Independent reflections                   | 1503 [R <sub>int</sub> = 0.0368, R <sub>sigma</sub> = 0.0275]        |
| Data/restraints/parameters                | 1503/0/92                                                            |
| Goodness-of-fit on F <sup>2</sup>         | 1.025                                                                |
| Final R indexes [I $\geq$ 2 $\sigma$ (I)] | R <sub>1</sub> = 0.0597, wR <sub>2</sub> = 0.1181                    |
| Final R indexes [all data]                | R <sub>1</sub> = 0.0426, wR <sub>2</sub> = 0.1085                    |

**Table S2** Crystal data and structure refinement for **TOB**

|                                           |                                                                      |
|-------------------------------------------|----------------------------------------------------------------------|
| CCDC number                               | 2216468                                                              |
| Empirical formula                         | C <sub>5</sub> H <sub>6</sub> O <sub>4</sub>                         |
| Formula weight                            | 130.10                                                               |
| Temperature/K                             | 179.99                                                               |
| Crystal system                            | monoclinic                                                           |
| Space group                               | P2 <sub>1</sub> /n                                                   |
| a/Å                                       | 9.5342(9)                                                            |
| b/Å                                       | 6.5619(4)                                                            |
| c/Å                                       | 9.7191(10)                                                           |
| $\alpha$ /°                               | 90                                                                   |
| $\beta$ /°                                | 115.851(12)                                                          |
| $\gamma$ /°                               | 90                                                                   |
| Volume/Å <sup>3</sup>                     | 547.20(10)                                                           |
| Z                                         | 4                                                                    |
| $\rho_{\text{calc}}/\text{cm}^3$          | 1.579                                                                |
| $\mu/\text{mm}^{-1}$                      | 0.140                                                                |
| F(000)                                    | 272                                                                  |
| Radiation                                 | Mo K $\alpha$                                                        |
| 2 $\Theta$ range for data collection/°    | 4.994 to 60.124                                                      |
| Index ranges                              | -13 $\leq$ h $\leq$ 11, -8 $\leq$ k $\leq$ 8, -13 $\leq$ l $\leq$ 13 |
| Reflections collected                     | 3541                                                                 |
| Independent reflections                   | 1381 [R <sub>int</sub> = 0.0407, R <sub>sigma</sub> = 0.0337]        |
| Data/restraints/parameters                | 1381/88/101                                                          |
| Goodness-of-fit on F <sup>2</sup>         | 1.024                                                                |
| Final R indexes [I $\geq$ 2 $\sigma$ (I)] | R <sub>1</sub> = 0.0807, wR <sub>2</sub> = 0.1626                    |
| Final R indexes [all data]                | R <sub>1</sub> = 0.0634, wR <sub>2</sub> = 0.1530                    |

**Table S3** Crystal data and structure refinement for **3Me-TOB**

|                                        |                                                               |
|----------------------------------------|---------------------------------------------------------------|
| CCDC number                            | 2216471                                                       |
| Empirical formula                      | C <sub>6</sub> H <sub>8</sub> O <sub>4</sub>                  |
| Formula weight                         | 144.12                                                        |
| Temperature/K                          | 100.00                                                        |
| Crystal system                         | orthorhombic                                                  |
| Space group                            | P2 <sub>1</sub> 2 <sub>1</sub> 2 <sub>1</sub>                 |
| a/Å                                    | 6.61470(10)                                                   |
| b/Å                                    | 8.8811(2)                                                     |
| c/Å                                    | 11.0758(2)                                                    |
| $\alpha$ /°                            | 90                                                            |
| $\beta$ /°                             | 90                                                            |
| $\gamma$ /°                            | 90                                                            |
| Volume/Å <sup>3</sup>                  | 650.66(2)                                                     |
| Z                                      | 4                                                             |
| $\rho_{\text{calc}}/\text{cm}^3$       | 1.471                                                         |
| $\mu/\text{mm}^{-1}$                   | 1.082                                                         |
| F(000)                                 | 304                                                           |
| Radiation                              | Cu K $\alpha$                                                 |
| 2 $\Theta$ range for data collection/° | 12.776 to 150.870                                             |
| Index ranges                           | -8 ≤ h ≤ 8, -10 ≤ k ≤ 11, -13 ≤ l ≤ 13                        |
| Reflections collected                  | 12322                                                         |
| Independent reflections                | 1315 [R <sub>int</sub> = 0.0166, R <sub>sigma</sub> = 0.0393] |
| Data/restraints/parameters             | 1315/0/92                                                     |
| Goodness-of-fit on F <sup>2</sup>      | 1.038                                                         |
| Final R indexes [I ≥ 2 $\sigma$ (I)]   | R <sub>1</sub> = 0.0271, wR <sub>2</sub> = 0.0613             |
| Final R indexes [all data]             | R <sub>1</sub> = 0.0254, wR <sub>2</sub> = 0.0606             |

## 2. Characterization of PTOB

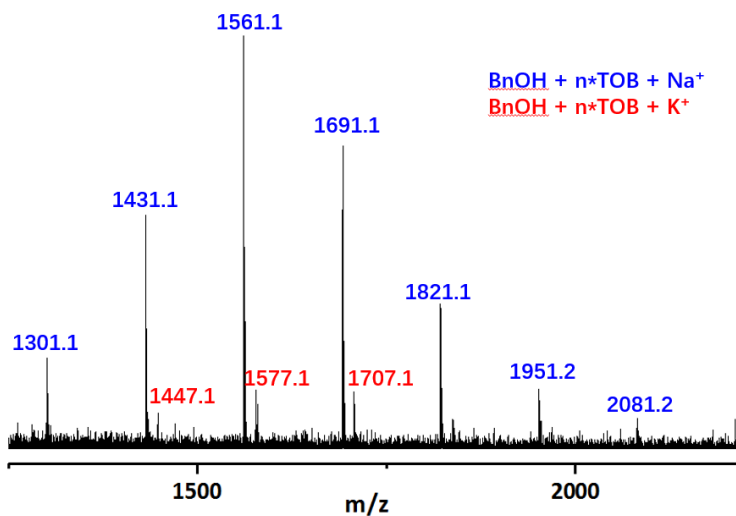

Fig. S4 MALDI-TOF mass spectrum of the BnOH-initiated linear PTOB (Table 1, entry 2)

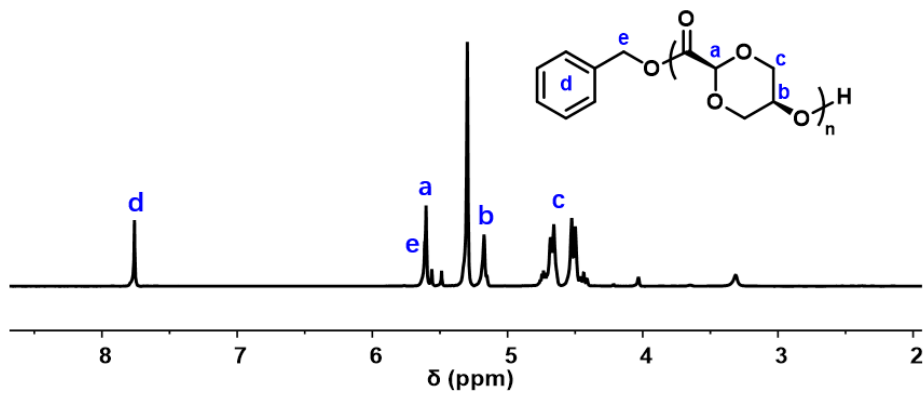

Fig. S5 <sup>1</sup>H NMR spectrum of PTOB (in *d*<sub>2</sub>-HFIP) (Table 1, entry 2)

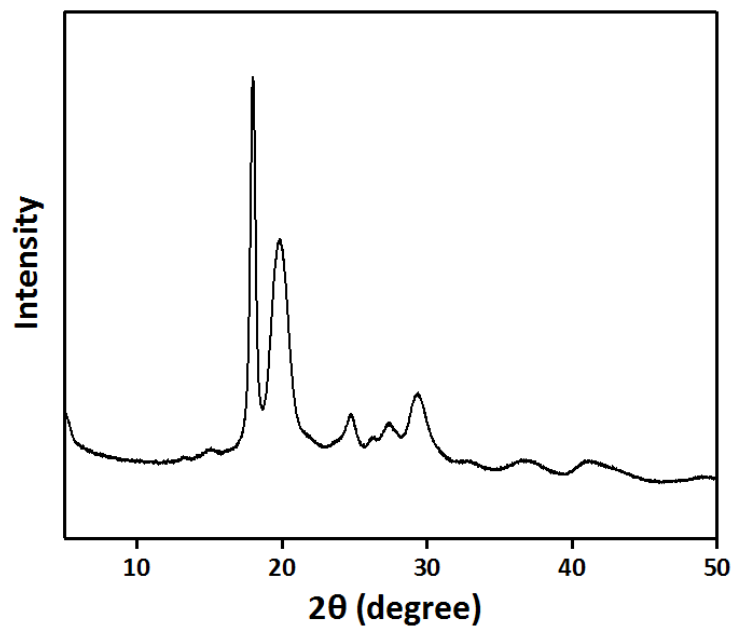

Fig. S6 Powder X-ray diffraction pattern of **PTOB**(Table 1, entry 2)

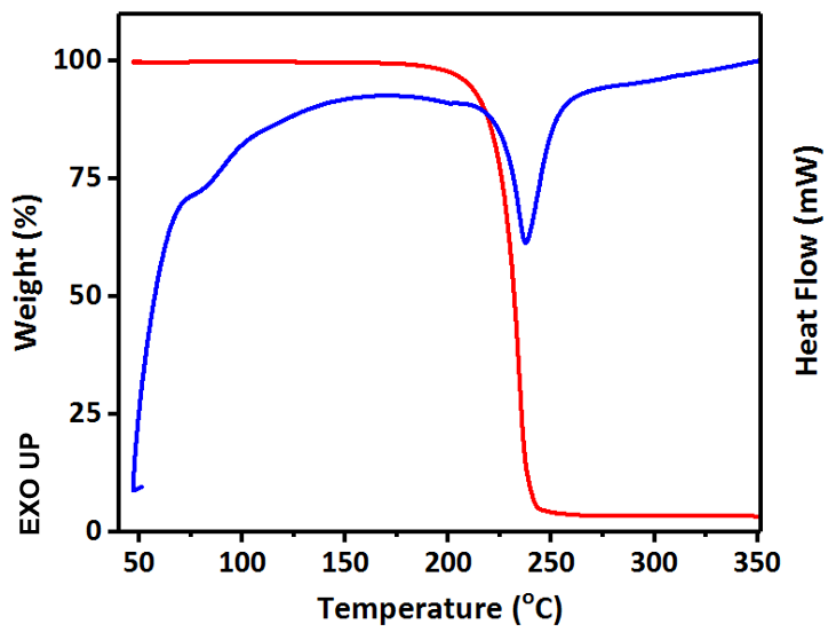

Fig. S7 TGA thermogram of **PTOB**. (20 °C/min,  $T_{d,5\%} = 210$  °C) (Table 1, entry 2)



### 3. Characterization of oligomers of TOB

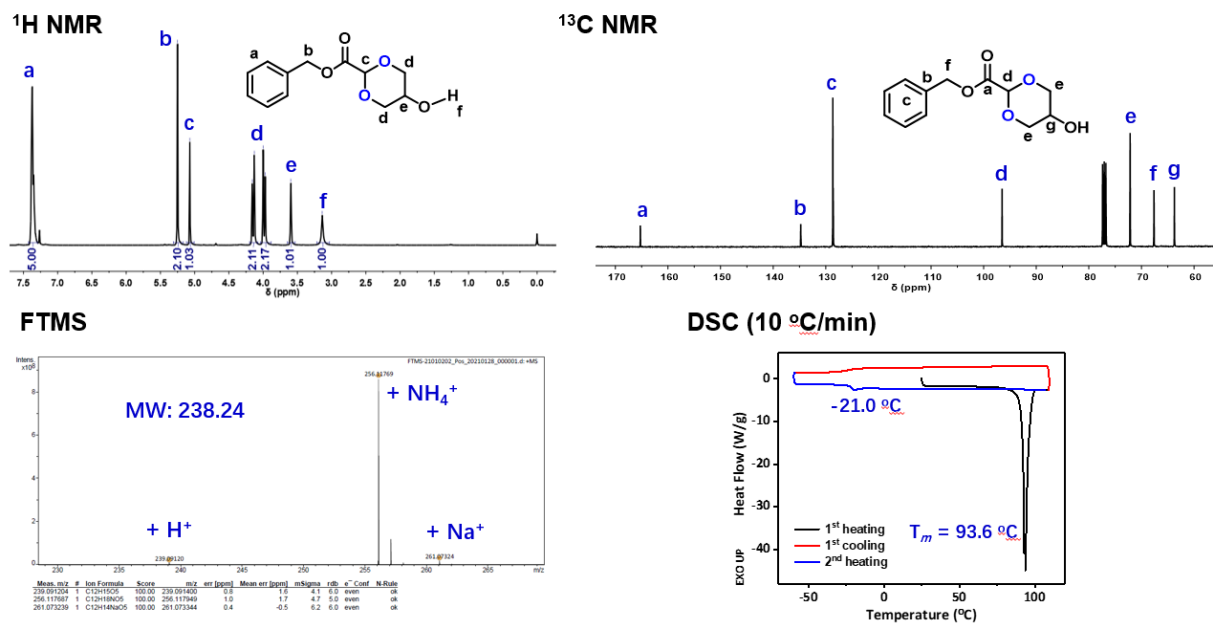

**Fig. S8** Characterization data of compound O1

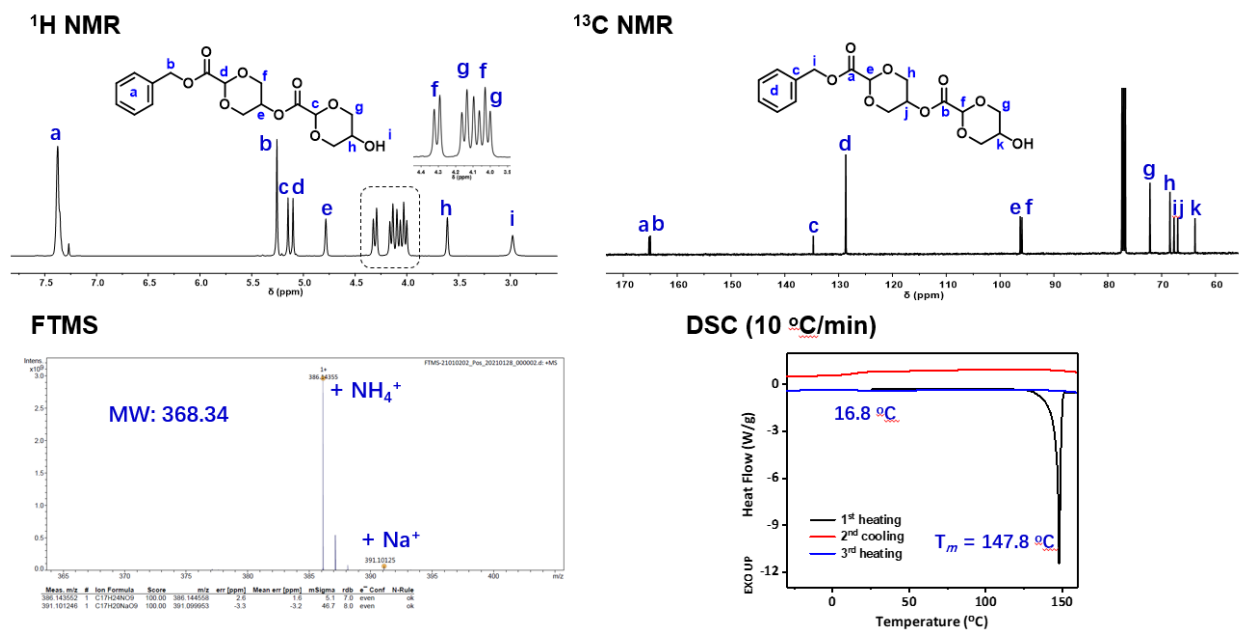

Fig. S9 Characterization data of compound O2

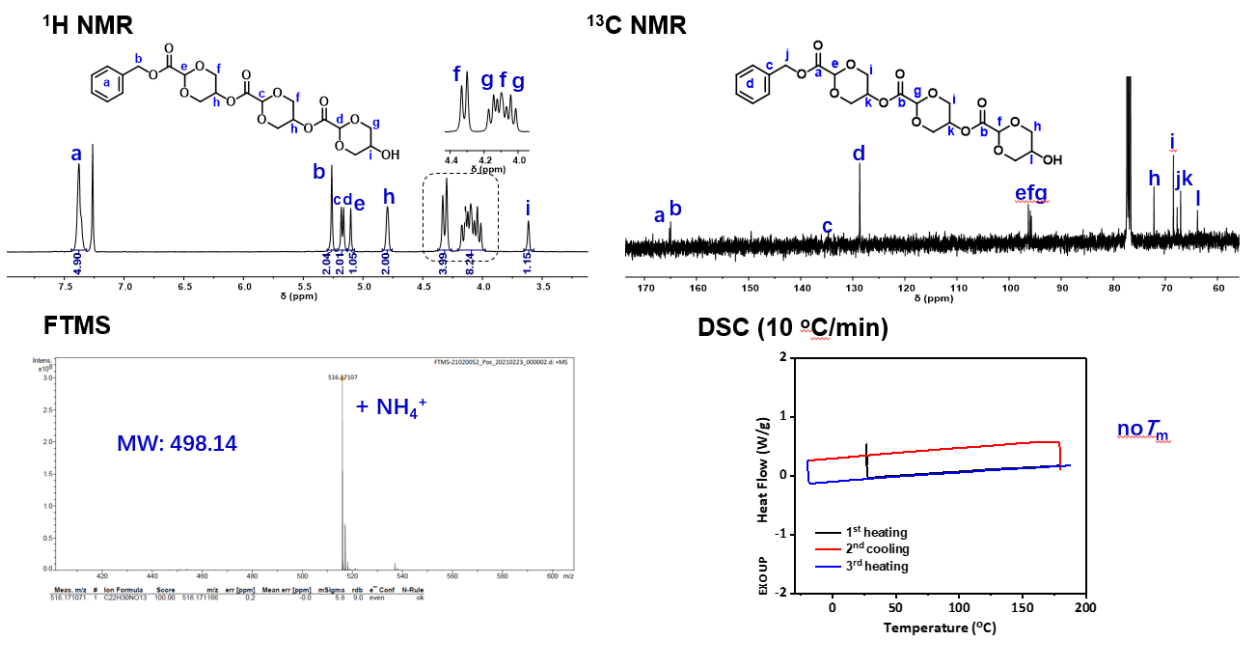

Fig. S10 Characterization data of compound O3

**Table S4** Solubility, melting temperature of **TOB** oligomers

|                           | <b>O1</b>                            | <b>O2</b>                                         | <b>O3</b>                      |
|---------------------------|--------------------------------------|---------------------------------------------------|--------------------------------|
| Solubility                | Soluble in EtOAc & CHCl <sub>3</sub> | Soluble in CHCl <sub>3</sub> & Insoluble in EtOAc | Insoluble in CHCl <sub>3</sub> |
| <i>T<sub>m</sub></i> (°C) | 93.6                                 | 147.8                                             | > 190                          |

**Table S5** Crystal data and structure refinement for compound **O1**

|                                                              |                                                                              |
|--------------------------------------------------------------|------------------------------------------------------------------------------|
| CCDC number                                                  | 2216477                                                                      |
| Empirical formula                                            | C <sub>12</sub> H <sub>14</sub> O <sub>5</sub>                               |
| Formula weight                                               | 238.23                                                                       |
| Temperature/K                                                | 169.99                                                                       |
| Crystal system                                               | monoclinic                                                                   |
| Space group                                                  | P2 <sub>1</sub> /c                                                           |
| <i>a</i> /Å                                                  | 11.1805(10)                                                                  |
| <i>b</i> /Å                                                  | 9.2464(10)                                                                   |
| <i>c</i> /Å                                                  | 11.1482(10)                                                                  |
| $\alpha$ /°                                                  | 90                                                                           |
| $\beta$ /°                                                   | 105.801(10)                                                                  |
| $\gamma$ /°                                                  | 90                                                                           |
| Volume/Å <sup>3</sup>                                        | 1108.945(19)                                                                 |
| <i>Z</i>                                                     | 4                                                                            |
| $\rho_{\text{calc}}$ /cm <sup>3</sup>                        | 1.427                                                                        |
| $\mu$ /mm <sup>-1</sup>                                      | 0.941                                                                        |
| F(000)                                                       | 504                                                                          |
| Crystal size/mm <sup>3</sup>                                 | 0.23 × 0.21 × 0.05                                                           |
| Radiation                                                    | Cu K $\alpha$                                                                |
| 2 $\theta$ range for data collection/°                       | 8.218 to 150.402                                                             |
| Index ranges                                                 | -13 ≤ <i>h</i> ≤ 13, -11 ≤ <i>k</i> ≤ 11, -13 ≤ <i>l</i> ≤ 13                |
| Reflections collected                                        | 14573                                                                        |
| Independent reflections                                      | 2202 [ <i>R</i> <sub>int</sub> = 0.0160, <i>R</i> <sub>sigma</sub> = 0.0089] |
| Data/restraints/parameters                                   | 1381/0/155                                                                   |
| Goodness-of-fit on <i>F</i> <sup>2</sup>                     | 1.104                                                                        |
| Final <i>R</i> indexes [ <i>I</i> ≥ 2 $\sigma$ ( <i>I</i> )] | <i>R</i> <sub>1</sub> = 0.0336, <i>wR</i> <sub>2</sub> = 0.0867              |
| Final <i>R</i> indexes [all data]                            | <i>R</i> <sub>1</sub> = 0.0341, <i>wR</i> <sub>2</sub> = 0.0869              |
| Largest diff. peak/hole / e Å <sup>-3</sup>                  | 0.19/-0.27                                                                   |

**Table S6** Crystal data and structure refinement for compound **O2**

|                                             |                                                               |
|---------------------------------------------|---------------------------------------------------------------|
| CCDC number                                 | 2216478                                                       |
| Empirical formula                           | C <sub>17</sub> H <sub>20</sub> O <sub>9</sub>                |
| Formula weight                              | 368.33                                                        |
| Temperature/K                               | 170.01(10)                                                    |
| Crystal system                              | orthorhombic                                                  |
| Space group                                 | Pna2 <sub>1</sub>                                             |
| a/Å                                         | 11.74180(10)                                                  |
| b/Å                                         | 34.0977(4)                                                    |
| c/Å                                         | 8.47780(10)                                                   |
| α/°                                         | 90                                                            |
| β/°                                         | 90                                                            |
| γ/°                                         | 90                                                            |
| Volume/Å <sup>3</sup>                       | 3394.24(6)                                                    |
| Z                                           | 8                                                             |
| ρ <sub>calc</sub> /cm <sup>3</sup>          | 1.442                                                         |
| μ/mm <sup>-1</sup>                          | 1.008                                                         |
| F(000)                                      | 1552.0                                                        |
| Crystal size/mm <sup>3</sup>                | 0.31 × 0.25 × 0.03                                            |
| Radiation                                   | Cu Kα                                                         |
| 2θ range for data collection/°              | 5.184 to 151.064                                              |
| Index ranges                                | -13 ≤ h ≤ 14, -41 ≤ k ≤ 42, -13 ≤ l ≤ 10                      |
| Reflections collected                       | 19029                                                         |
| Independent reflections                     | 5758 [R <sub>int</sub> = 0.0198, R <sub>sigma</sub> = 0.0195] |
| Data/restraints/parameters                  | 5758/1/471                                                    |
| Goodness-of-fit on F <sup>2</sup>           | 1.027                                                         |
| Final R indexes [I ≥ 2σ(I)]                 | R <sub>1</sub> = 0.0366, wR <sub>2</sub> = 0.1007             |
| Final R indexes [all data]                  | R <sub>1</sub> = 0.0377, wR <sub>2</sub> = 0.1018             |
| Largest diff. peak/hole / e Å <sup>-3</sup> | 0.77/-0.36                                                    |

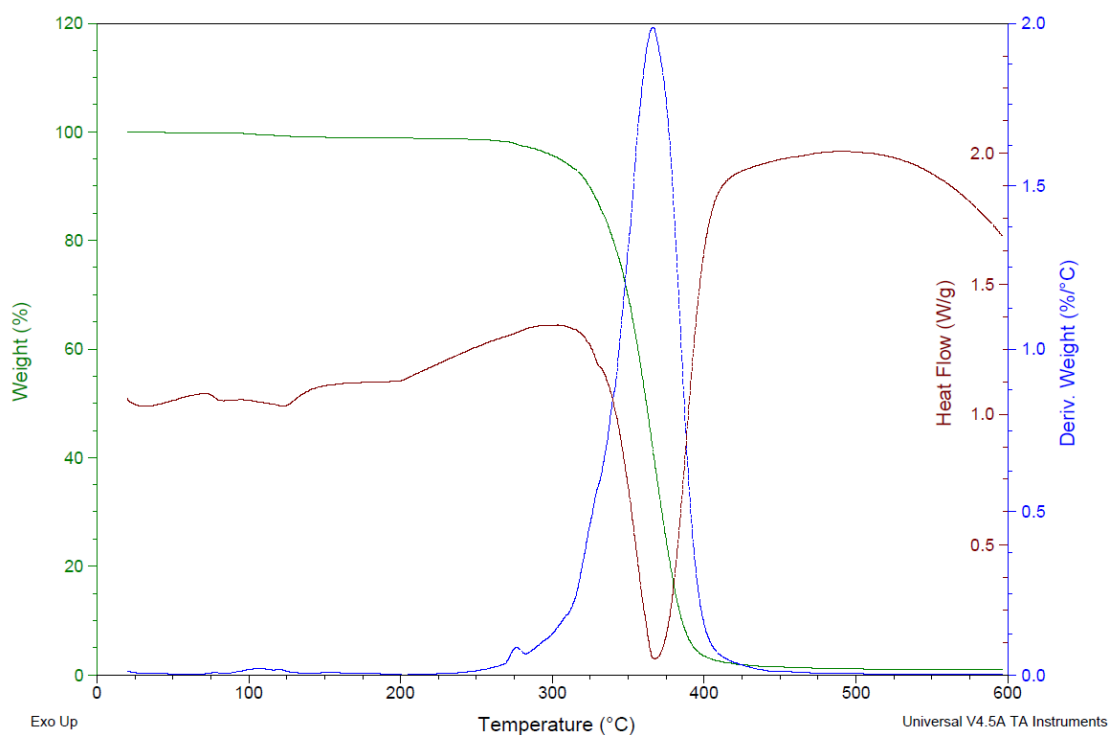

**Fig. S11** TGA thermogram of PLA-co-PTOB. (20 °C/min,  $T_{d,5\%} = 310$  °C)

**Table S7** Four typical copolymers for sequence analysis

| Sample         | Monomer              | [LA]:[TOB]:[I] | TOB<br>mol/% | $T_g/^\circ\text{C}$ |
|----------------|----------------------|----------------|--------------|----------------------|
| 1 <sup>a</sup> | <i>rac</i> -LA + TOB | 50:150:1       | 49           | 99.1                 |
| 2 <sup>a</sup> | <i>rac</i> -LA + TOB | 150:50:1       | 13           | 56.7                 |
| 3 <sup>b</sup> | <i>L</i> -LA + TOB   | 400:400:1      | 40           | 92.9                 |
| 4 <sup>b</sup> | <i>L</i> -LA + TOB   | 666:133:1      | 13           | 70.0                 |

<sup>a</sup> BnOH as initiator, [M]=2 M, DCM, 30 °C, 6 h.;

<sup>b</sup> 1,4-benzenedimethanol as initiator, [M]=1 M, DCM, -20 °C, 12 h

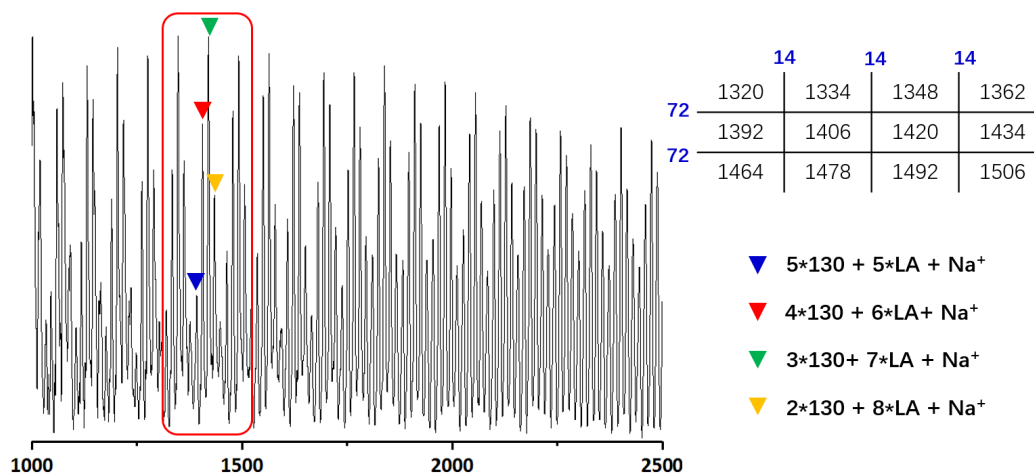

**Fig. S12** MALDI-ToF mass spectra of PLA-*co*-PTOB. There are cyclic polymers due to transesterification and copolymers containing 1/2 LA units. The  $\Delta m/z$  of the three groups of peaks in the red square is 1/2 MW of LA. The four peaks of inverted triangulation,  $\Delta m/z = 14$ , are the difference of MW between **TOB** and LA.

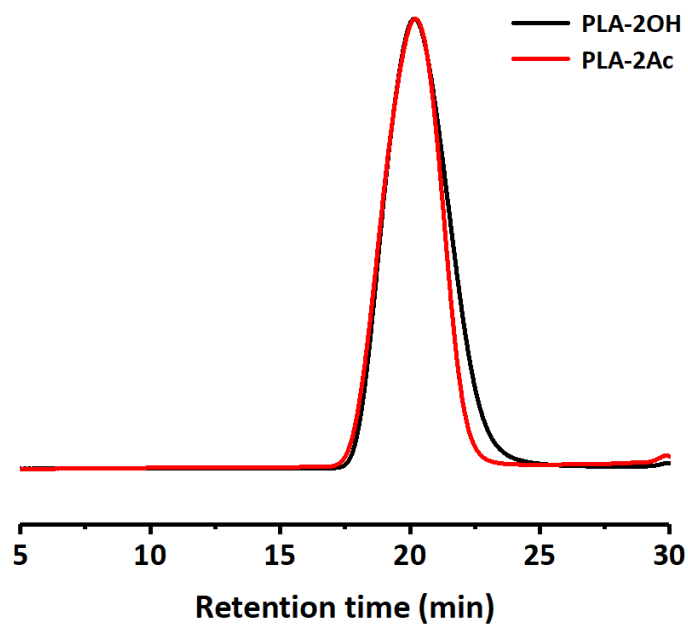

**Fig. S13** GPC traces of PLA-2OH ( $M_n = 24.4$  kDa,  $D = 1.31$ ) and PLA-2Ac ( $M_n = 28.1$  kDa,  $D = 1.26$ )

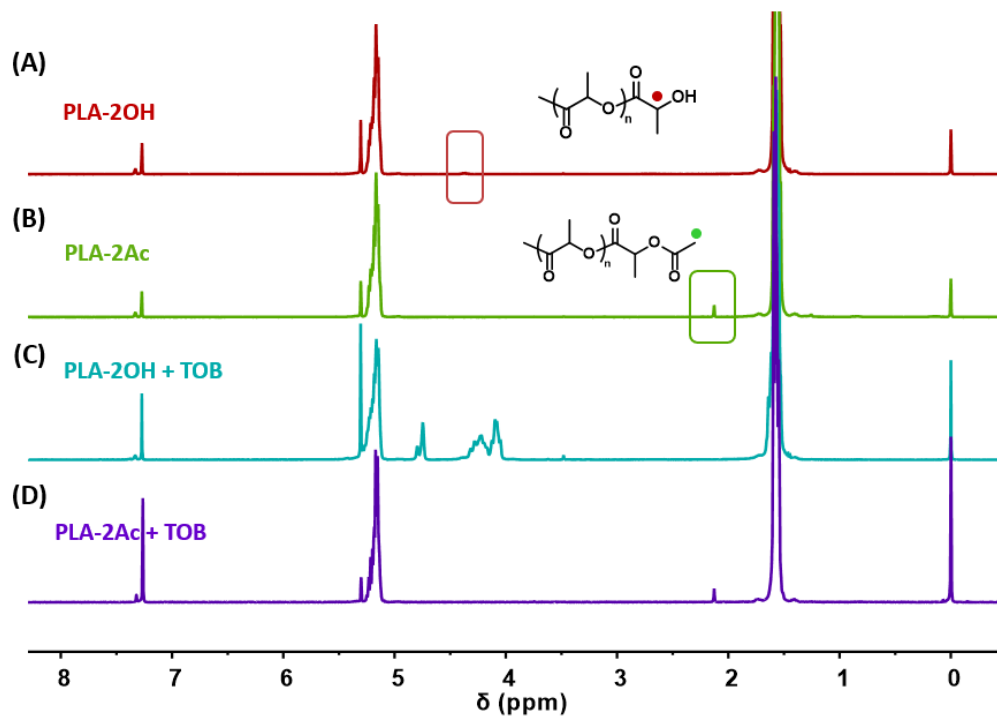

**Fig. S14**  $^1\text{H}$  NMR spectra of (A)  $\alpha$ ,  $\omega$ -PLA diol sample (PLA-2OH); (B) acetyl-capped PLA sample (PLA-2Ac); (C) PLA-*co*-PTOB obtained by the TBD-catalyzed ring-opening transesterification polymerization of PLA-2OH with **TOB**; (D) recovered PLA-2Ac after being reacted with **TOB** in the presence of TBD.
